# Supplementary material for: Accuracy of the Veterans Health Administration COVID-19 (VACO) Index for predicting short-term mortality among 1,307 Yale New Haven Hospital inpatients and 427,224 Medicare patients
Source: bioRxiv or medRxiv preprint supplement (doi:10.1101/2021.01.01.20249069), 2021-01-04
Supplement: Supplementary file [file media-1.pdf]

**S1. Checklist. TRIPOD Checklist**

| Section/Topic                |     | Checklist Item                                                                                                                                                                                        | Page                                  |
|------------------------------|-----|-------------------------------------------------------------------------------------------------------------------------------------------------------------------------------------------------------|---------------------------------------|
| <b>Title and abstract</b>    |     |                                                                                                                                                                                                       |                                       |
| Title                        | 1   | Identify the study as developing and/or validating a multivariable prediction model, the target population, and the outcome to be predicted.                                                          | Title Page                            |
| Abstract                     | 2   | Provide a summary of objectives, study design, setting, participants, sample size, predictors, outcome, statistical analysis, results, and conclusions.                                               | Abstract                              |
| <b>Introduction</b>          |     |                                                                                                                                                                                                       |                                       |
| Background and objectives    | 3a  | Explain the medical context (including whether diagnostic or prognostic) and rationale for developing or validating the multivariable prediction model, including references to existing models.      | Introduction, paragraphs 1-3          |
|                              | 3b  | Specify the objectives, including whether the study describes the development or validation of the model or both.                                                                                     | Introduction, paragraph 4             |
| <b>Methods</b>               |     |                                                                                                                                                                                                       |                                       |
| Source of data               | 4a  | Describe the study design or source of data (e.g., randomized trial, cohort, or registry data), separately for the development and validation data sets, if applicable.                               | Methods, data source and participants |
|                              | 4b  | Specify the key study dates, including start of accrual; end of accrual; and, if applicable, end of follow-up.                                                                                        | Methods, data source and participants |
| Participants                 | 5a  | Specify key elements of the study setting (e.g., primary care, secondary care, general population) including number and location of centres.                                                          | Methods, data source and participants |
|                              | 5b  | Describe eligibility criteria for participants.                                                                                                                                                       | Methods, data source and participants |
|                              | 5c  | Give details of treatments received, if relevant.                                                                                                                                                     | N/A                                   |
| Outcome                      | 6a  | Clearly define the outcome that is predicted by the prediction model, including how and when assessed.                                                                                                | Methods, data source and participants |
|                              | 6b  | Report any actions to blind assessment of the outcome to be predicted.                                                                                                                                | Methods, data source and participants |
| Predictors                   | 7a  | Clearly define all predictors used in developing or validating the multivariable prediction model, including how and when they were measured.                                                         | Methods, VACO Index components        |
|                              | 7b  | Report any actions to blind assessment of predictors for the outcome and other predictors.                                                                                                            | Methods, statistical analysis         |
| Sample size                  | 8   | Explain how the study size was arrived at.                                                                                                                                                            | Methods, data source and participants |
| Missing data                 | 9   | Describe how missing data were handled (e.g., complete-case analysis, single imputation, multiple imputation) with details of any imputation method.                                                  | Methods, statistical analysis         |
| Statistical analysis methods | 10c | For validation, describe how the predictions were calculated.                                                                                                                                         | Methods, statistical analysis         |
|                              | 10d | Specify all measures used to assess model performance and, if relevant, to compare multiple models.                                                                                                   | Methods, statistical analysis         |
|                              | 10e | Describe any model updating (e.g., recalibration) arising from the validation, if done.                                                                                                               | Methods, statistical analysis         |
| Risk groups                  | 11  | Provide details on how risk groups were created, if done.                                                                                                                                             | Methods, statistical analysis         |
| Development vs. validation   | 12  | For validation, identify any differences from the development data in setting, eligibility criteria, outcome, and predictors.                                                                         | Methods, data source and participants |
| <b>Results</b>               |     |                                                                                                                                                                                                       |                                       |
| Participants                 | 13a | Describe the flow of participants through the study, including the number of participants with and without the outcome and, if applicable, a summary of the follow-up time. A diagram may be helpful. | Results, participants                 |

|                           |     |                                                                                                                                                                                                    |                                  |
|---------------------------|-----|----------------------------------------------------------------------------------------------------------------------------------------------------------------------------------------------------|----------------------------------|
|                           | 13b | Describe the characteristics of the participants (basic demographics, clinical features, available predictors), including the number of participants with missing data for predictors and outcome. | Results, participants            |
|                           | 13c | For validation, show a comparison with the development data of the distribution of important variables (demographics, predictors and outcome).                                                     | Results, participants            |
| Model performance         | 16  | Report performance measures (with CIs) for the prediction model.                                                                                                                                   | Results, risk factors            |
| Model-updating            | 17  | If done, report the results from any model updating (i.e., model specification, model performance).                                                                                                | Results, VACO Index supplemented |
| <b>Discussion</b>         |     |                                                                                                                                                                                                    |                                  |
| Limitations               | 18  | Discuss any limitations of the study (such as nonrepresentative sample, few events per predictor, missing data).                                                                                   | Discussion, limitations          |
| Interpretation            | 19a | For validation, discuss the results with reference to performance in the development data, and any other validation data.                                                                          | Discussion, paragraphs 1-2       |
|                           | 19b | Give an overall interpretation of the results, considering objectives, limitations, results from similar studies, and other relevant evidence.                                                     | Discussion, paragraphs 1-5       |
| Implications              | 20  | Discuss the potential clinical use of the model and implications for future research.                                                                                                              | Discussion, paragraph 3          |
| <b>Other information</b>  |     |                                                                                                                                                                                                    |                                  |
| Supplementary information | 21  | Provide information about the availability of supplementary resources, such as study protocol, Web calculator, and data sets.                                                                      | Discussion, paragraph 3          |
| Funding                   | 22  | Give the source of funding and the role of the funders for the present study.                                                                                                                      | Funding                          |

**S1. Table: Charlson Comorbidity Index Determination from ICD-10 Diagnosis Codes**

| Comorbidity                               | ICD-10 Diagnosis Codes                                                                                                                                                        | Weight |
|-------------------------------------------|-------------------------------------------------------------------------------------------------------------------------------------------------------------------------------|--------|
| AIDS (acquired immunodeficiency syndrome) | B20.x–B22.x, B24.x                                                                                                                                                            | 6      |
| Cancer                                    | C00.x–C26.x, C30.x–C34.x, C37.x–C41.x, C43.x, C45.x–C58.x, C60.x–C76.x, C81.x–C85.x, C88.x, C90.x–C97.x                                                                       | 2      |
| Cancer, metastatic                        | C77.x–C80.x                                                                                                                                                                   | 6      |
| Cerebrovascular disease                   | G45.x, G46.x, H34.0, I60.x–I69.x                                                                                                                                              | 1      |
| Chronic pulmonary disease                 | I27.8, I27.9, J40.x–J47.x, J60.x–J67.x, J68.4, J70.1, J70.3                                                                                                                   | 1      |
| Congestive heart failure (CHF)            | I09.9, I11.0, I13.0, I13.2, I25.5, I42.0, I42.5–I42.9, I43.x, I50.x, P29.0                                                                                                    | 1      |
| Dementia                                  | F00.x–F03.x, F05.1, G30.x, G31.1                                                                                                                                              | 1      |
| Diabetes                                  | E10.0, E10.1, E10.6, E10.8, E10.9, E11.0, E11.1, E11.6, E11.8, E11.9, E12.0, E12.1, E12.6, E12.8, E12.9, E13.0, E13.1, E13.6, E13.8, E13.9, E14.0, E14.1, E14.6, E14.8, E14.9 | 1      |
| Diabetes with complications               | E10.2–E10.5, E10.7, E11.2–E11.5, E11.7, E12.2–E12.5, E12.7, E13.2–E13.5, E13.7, E14.2–E14.5, E14.7                                                                            | 2      |
| Liver disease, mild                       | B18.x, K70.0–K70.3, K70.9, K71.3–K71.5, K71.7, K73.x, K74.x, K76.0, K76.2–K76.4, K76.8, K76.9, Z94.4                                                                          | 1      |
| Liver disease, moderate or severe         | I85.0, I85.9, I86.4, I98.2, K70.4, K71.1, K72.1, K72.9, K76.5, K76.6, K76.7                                                                                                   | 3      |
| Myocardial infarction (MI)                | I21.x, I22.x, I25.2, I09.9, I11.0, I13.0, I13.2, I25.5, I42.0, I42.5–I42.9, I43.x, I50.x, P29.0                                                                               | 1      |
| Peptic ulcer disease (PUD)                | K25.x–K28.x                                                                                                                                                                   | 1      |
| Peripheral vascular disease (PVD)         | I70.x, I71.x, I73.1, I73.8, I73.9, I77.1, I79.0, I79.2, K55.1, K55.8, K55.9, Z95.8, Z95.9                                                                                     | 1      |
| Plegia                                    | G04.1, G11.4, G80.1, G80.2, G81.x, G82.x, G83.0–G83.4, G83.9                                                                                                                  | 2      |
| Renal disease                             | I12.0, I13.1, N03.2–N03.7, N05.2–N05.7, N18.x, N19.x, N25.0, Z49.0–Z49.2, Z94.0, Z99.2                                                                                        | 2      |
| Rheumatic disease                         | M05.x, M06.x, M31.5, M32.x–M34.x, M35.1, M35.3, M36.0                                                                                                                         | 1      |

Index calculated by summing comorbidity weights. Three comorbidity pairs are mutually exclusive: Cancer or Cancer, metastatic; Diabetes or Diabetes with complications; and Liver disease, mild or Liver disease, moderate or severe – only use the higher weight, not both.

Adapted from Quan *et al.*, Coding algorithms for defining comorbidities in ICD-9 and ICD-10 administrative data. *Med Care* 2005; 43(11): 1130-1139.

**S1. File: VACO Index Calculation of Predicted COVID-19 30-day Mortality**

| <b>Variable</b>              | <b>Coefficient</b> | <b>Z</b> | <b>P-value</b> | <b>OR</b> | <b>95% CI</b> |
|------------------------------|--------------------|----------|----------------|-----------|---------------|
| Age, years                   |                    |          |                |           |               |
| 20-49                        | -2.228678713       | -2.83    | 0.005          | 0.11      | 0.02 - 0.50   |
| 50-54                        | 0.0                |          | -              | 1.00      | -             |
| 55-59                        | 0.400599289        | 0.97     | 0.334          | 1.49      | 0.66 - 3.36   |
| 60-64                        | 0.941322019        | 2.50     | 0.013          | 2.56      | 1.22 - 5.37   |
| 65-69                        | 1.295007128        | 3.49     | <0.001         | 3.65      | 1.77 - 7.55   |
| 70-74                        | 1.629533438        | 4.55     | <0.001         | 5.10      | 2.53 - 10.3   |
| 75-79                        | 1.763345763        | 4.72     | <0.001         | 5.83      | 2.81 - 12.12  |
| 80-89                        | 1.927443543        | 4.96     | <0.001         | 6.87      | 3.21 - 14.72  |
| ≥90                          | 2.018752269        | 4.39     | <0.001         | 7.53      | 3.06 - 18.54  |
| Sex                          |                    |          |                |           |               |
| Female                       | 0.0                | -        | -              | 1.00      | -             |
| Male                         | 0.322291449        | 0.88     | 0.377          | 1.38      | 0.68 - 2.82   |
| CCI and Age Interaction Term |                    |          |                |           |               |
| Age <85                      |                    |          |                |           |               |
| CCI                          |                    |          |                |           |               |
| 0                            | 0.0                | -        | -              | -         | -             |
| 1-3                          | 0.612122574        | 2.76     | 0.006          | 1.84      | 1.19 - 2.85   |
| 4-5                          | 0.825072847        | 3.36     | 0.001          | 2.28      | 1.41 - 3.69   |
| 6-9                          | 0.956099733        | 3.84     | <0.001         | 2.60      | 1.60 - 4.24   |
| ≥10                          | 1.395164653        | 4.25     | <0.001         | 4.04      | 2.12 - 7.68   |
| Age 85+, any CCI             | 1.529325519        | 4.79     | <0.001         | 4.62      | 2.47 - 8.63   |
| MI or PVD                    |                    |          |                |           |               |
| No                           | 0.0                | -        | -              | 1.00      | -             |
| Yes                          | 0.267265312        | 2.18     | 0.029          | 1.31      | 1.03 - 1.66   |
| Constant                     | -4.216058062       | -8.41    | <0.001         | 0.01      | 0.01 - 0.04   |

Abbreviations: OR = odds ratio; CI = confidence interval; CCI =Charlson comorbidity index; MI = myocardial infarction; PVD = peripheral vascular disease

Calculation of predicted mortality risk:

$$\text{coefficient}_{\text{sum}} = \text{Age}_{\text{coefficient}} + \text{Sex}_{\text{coefficient}} + \text{CCI\_Age}_{\text{coefficient}} + \text{MI\_PVD}_{\text{coefficient}} + \text{Constant}_{\text{coefficient}}$$

$$\text{OR}_{\text{calc}} = \exp(\text{coefficient}_{\text{sum}})$$

$$\text{risk}_{\text{pred}} = \text{OR}_{\text{calc}} / (1 + \text{OR}_{\text{calc}})$$

Example: 77 year old male with CCI = 5, but no history of MI or PVD

$$\text{coefficient}_{\text{sum}} = 1.763345763 + 0.322291449 + 0.825072847 + 0.0 + (-4.216058062) = -1.305348004$$

$$\text{OR}_{\text{calc}} = \exp(-1.305348004) = 0.271078182$$

$$\text{risk}_{\text{pred}} = 0.271078182 / (1 + 0.271078182) = 0.213266333 = 21\%$$
